# Supplementary material for: Resveratrol and curcumin enhance pancreatic β-cell function by inhibiting phosphodiesterase activity
Source: PubMed Central journal article supplement (PMC4191183; doi:10.1530/joe-14-0335), 2014-11

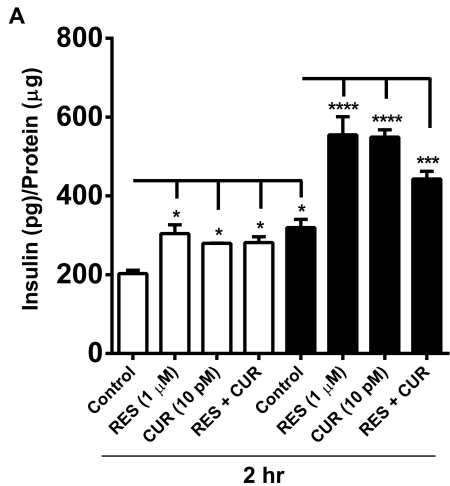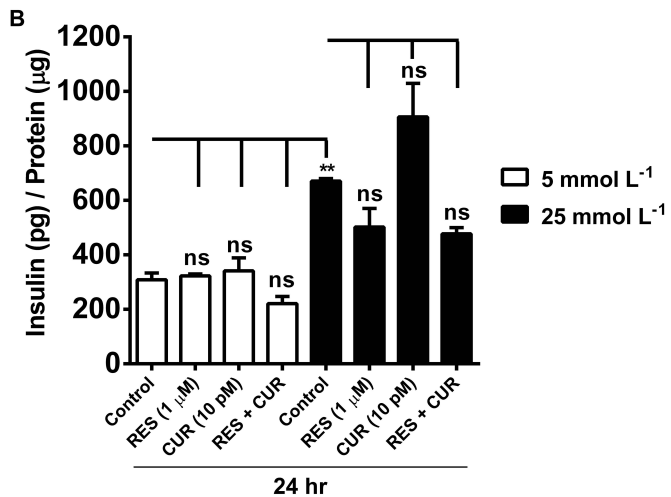

Supplement: supp_223.2.107_Supplementary_figure_2.pdf [file supp_223.2.107_Supplementary_figure_2.pdf]
